# Supplementary material
Source: ML conference proceedings conference paper supplement (https://openaccess.thecvf.com/content/CVPR2024/html/Chen_How_to_Make_CVPR_2024_paper.html)
Supplement: Supplementary file 1 [file Chen_How_to_Make_CVPR_2024_supplemental.pdf]

## How to Make Cross Encoder a Good Teacher for Efficient Image-Text Retrieval?

### Supplementary Materials

In this supplementary materials, we further explain the differences and connections between score distribution distillation and ranking distillation, in order to analyze the advantages of ranking distillation in the process of distilling knowledge from cross-encoder to dual-encoder. We also elaborate on (1) details about pre-training datasets, downstream datasets, and evaluation metrics of downstream tasks; (2) Visualizations about image-to-text retrieval and text-to-image retrieval. (3) More ablation study for CPRD loss.

#### A. Score Distribution Distillation and Ranking Distillation

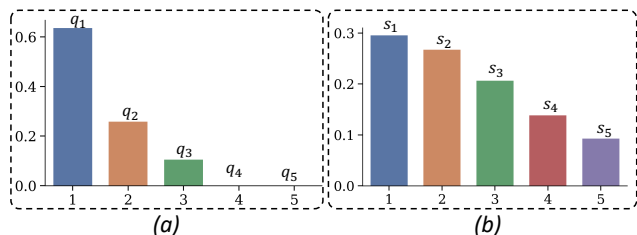

Figure 1. (a) KL-divergence-based distillation targets from cross-encoder. (b) Predicted similarity scores from student dual-encoder after softmax operation.

Score distribution distillation (*i.e.*, KL-divergence-based knowledge distillation) requires the student and teacher models have the same score distribution over multiple samples. Upon further analysis, we find that score distribution can be interpreted as ranking distillation with additional constraints. As shown in Figure 1, given an image and multiple texts  $t_i$ ,  $i \in \{1, 2, \dots, 5\}$ , we compute their similarity  $p_i$  with cross-encoder and construct distillation target  $q_i$  by applying softmax operation over these scores. A hyperparameter  $\tau$  is employed to control the sharpness of distillation target. Without loss of generality, we assume that:

$$p_1 > p_2 > p_3 > p_4 > p_5. \quad (1)$$

We can prove that:

$$\begin{aligned} & \text{if } p_i - p_j > p_m - p_n, \\ & \text{then } q_i - q_j > q_m - q_n, \end{aligned}$$

$$\forall i, j, m, n \in \{1, 2, \dots, 5\}, i < j \leq m < n, \tau > 0. \quad (2)$$

*Proof.* According to Mean value theorem,

$$q_i - q_j = \frac{e^{p_i/\tau} - e^{p_j/\tau}}{\sum_k e^{p_k/\tau}} = \frac{(e^a)'(p_i/\tau - p_j/\tau)}{\sum_k e^{p_k/\tau}}, \quad (3)$$

where  $a \in (p_i/\tau, p_j/\tau)$ . Similarly,

$$q_m - q_n = \frac{(e^b)'(p_m/\tau - p_n/\tau)}{\sum_k e^{p_k/\tau}}, \quad (4)$$

where  $b \in (p_m/\tau, p_n/\tau)$ . Given the assumption of Equation 1 and 2, we can derive that  $a > b$  and thus  $q_i - q_j > q_m - q_n$ .

In other words, taking  $t_1, t_2, t_3$  as examples,  $p_1 > p_2 > p_3$  and  $p_1 - p_2 > p_2 - p_3$ , then the values  $q_i$  satisfy  $q_1 - q_2 > q_2 - q_3$  with any  $\tau > 0$ . Such a distillation target requires that:

$$s_1 > s_2 > s_3, \quad (5)$$

$$s_1 - s_2 > s_2 - s_3, \quad (6)$$

where  $s_1, s_2, s_3$  is the similarity scores (after softmax) from student model. Note that the objective of Equation 5 is the same as ranking distillation. However, the additional constraint of Equation 6 may interfere with the learning of image-text alignment due to the significant difference between the similarity distributions of dual-encoder and cross-encoder, which is validated by our experimental results.

#### B. Datasets Details

Table 1. Statics of the pre-training datasets.

|       | COCO (Karpathy-train) | VG   | CC3M  | SBU  |
|-------|-----------------------|------|-------|------|
| image | 113K                  | 100K | 2.81M | 825K |
| text  | 567K                  | 769K | 2.81M | 825K |

**Pre-training datasets.** We show the statistics of the images and texts of pre-training datasets in the Table 1

**MSCOCO.** MSCOCO [5] is a large image-text dataset of 123K images, where each image has 5 human-annotated captions. Following [3, 4, 6], we adopt the Karpathy split of MSCOCO, where 5K/5K/113K images are used for testing, validation and training respectively.

**Flickr30K.** Flickr30K contains 31K images and 159K captions. Each image is usually annotated with 5 captions. Following [1], we 1K/1K/29K images for testing, validation and training respectively.

**Crisscrossed Captions.** Crisscrossed Captions dataset [7] is an extension of MS-COCO dataset with human semantic similarity judgments for intra- and inter- modality pairs. It contains human ratings for 267,095 pairs (derived from 1,335,475 independent judgments), a massive extension in scale and detail to the 50k original binary pairings.

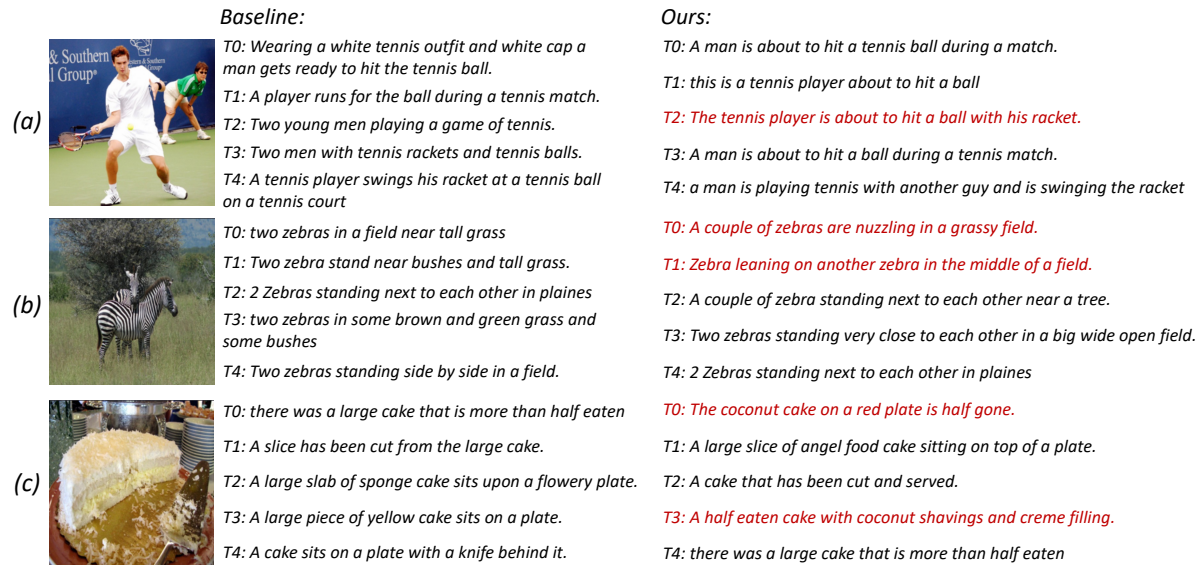

Figure 2. Illustration of image-to-text retrieval of our model and baseline model. Ground-truth captions for each image are in red color.

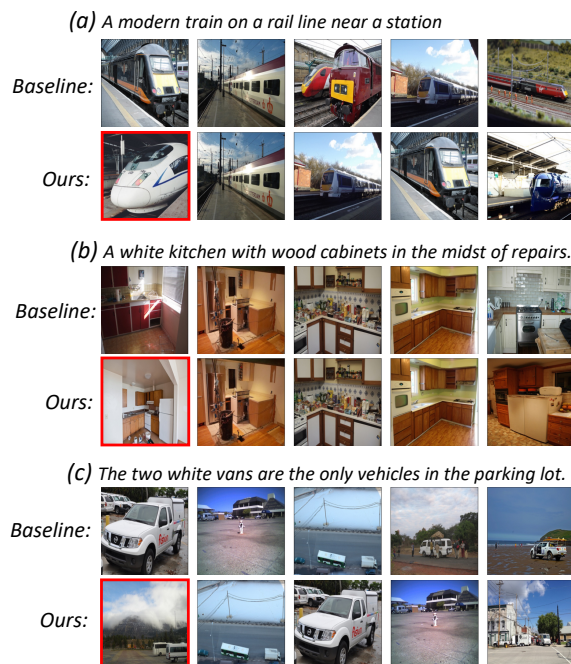

Figure 3. Illustration of text-to-image retrieval results of our model and baseline model. The ground-truth image for each text is in the red box.

068

## C. Evaluation Metrics

069

070

071

072

073

**Retrieval.** We report the widely-used  $R@k$  ( $k=1,5,10$ ) for cross-modal retrieval, which is the proportion of matched samples found in the top- $k$  retrieved results. We also report  $R@S$  to reveal the overall performance, which is defined as the sum of  $R@k$  metrics at  $k=\{1,5,10\}$  of both image-to-text

and text-to-image retrieval tasks.

**Ranking.** We report the Spearman’s bootstrap correlation following [2, 7] to assess whether a model ranks pairs similarly to human raters. For each correlation estimate, we sample half of the queries (to increase diversity across samples) and for each selected query, we choose one of the items for which Crisscross caption dataset supplies a paired rating. We compute Spearman’s correlation between the ground-truth scores and the model scores for the selected pairs. The final correlation is the average over 1000 of these bootstrap samples.

## D. Visualizations

**Image-to-text Retrieval.** We show image-to-text retrieval results on the MSCOCO test set in the Figure 2. We can observe that: (1) Our model has a more precise perception of detailed objects and actions in the image, *e.g.*, the baseline model erroneously identifies “white cap”, “run” from the (a), while our method accurately determines that it is a man hitting a ball with a racket; (2) Our model correctly recognizes detailed relation “nuzzling” and “leaning” in the (b), while the baseline model fails to achieve such recognition; (3) Our model achieves better cross-modal matching for rare concepts, as shown in (c), where our model recognizes the “coconut” and aligns it with the corresponding text.

**Text-to-image Retrieval.** The text-to-image results are shown in Figure 3. It can be seen that: (1) Our model perceives abstract adjectives more accurately, *e.g.*, “a modern train” in (a); (2) Our model understands local text semantics “in the midst of repairs” better and find the image that contains repair tools in (b), but the baseline model only finds

074

075

076

077

078

079

080

081

082

083

084

085

086

087

088

089

090

091

092

093

094

095

096

097

098

099

100

101

102

103

104

105 the images with “kitchen” and “cabinets”; (3) Our model  
106 has better understanding on the number, *e.g.*, our model find  
107 the image with only “two” white vans accurately in (c).

## 108 E. Ablation Study

Table 2. The Spearman’s rank correlation ( $\times 100$ ) of samples from different ranking intervals between DE and CE.

| Rank Interval | image $\rightarrow$ text |       | text $\rightarrow$ image |       |
|---------------|--------------------------|-------|--------------------------|-------|
|               | DE                       | +CPRD | DE                       | +CPRD |
| 1-16          | 53.1                     | 61.3  | 50.7                     | 60.0  |
| 17-32         | 17.0                     | 22.8  | 16.8                     | 21.7  |
| 33-48         | 10.1                     | 14.7  | 15.7                     | 12.8  |
| 49-64         | 7.1                      | 10.0  | 23.1                     | 27.4  |

109 **The effect of ranking mimicking.** To validate whether  
110 our method mimics the ranking of cross-encoder, we use  
111 dual-encoder to retrieve the top 64 texts/images given each  
112 image/text of MSCOCO test dataset. Then we re-rank the  
113 retrieved texts/images in the different rank interval (*i.e.*, 1-  
114 16, 17-32, 33-48, 49-64) with cross-encoder and compute  
115 the spearman’s rank correlation. As shown in Table 2, ap-  
116 plying our CPRD method on the dual-encoder improves the  
117 rank correlation on most of the rank intervals, validating the  
118 effectiveness of our method in mimicking cross-encoder’s  
119 ranking. It is worth noting that the rank correlation degrades  
120 for top 33-48 retrieved images given texts, but the relative  
121 order between these lower-ranked samples is not important  
122 and our method is designed to disregard this order.

Table 3. The performance comparison with variation of  $\mathcal{L}_{ij}$ .

| Loss Type                | image $\rightarrow$ text |             |             | text $\rightarrow$ image |             |             | R@S          |
|--------------------------|--------------------------|-------------|-------------|--------------------------|-------------|-------------|--------------|
|                          | R@1                      | R@5         | R@10        | R@1                      | R@5         | R@10        |              |
| None                     | 32.0                     | 59.4        | 71.5        | 24.4                     | 49.5        | 61.0        | 297.8        |
| $\hat{\mathcal{L}}_{ij}$ | 31.3                     | 59.7        | 71.1        | 23.9                     | 48.1        | 59.5        | 293.6        |
| $\mathcal{L}_{ij}$       | <b>34.3</b>              | <b>61.4</b> | <b>73.2</b> | <b>27.0</b>              | <b>52.8</b> | <b>64.5</b> | <b>313.2</b> |

123 **The variant of our proposed contrastive partial ranking**  
124 **distillation loss.** Here, we want to explore “Does it impor-  
125 tant to constrain that valid hard negatives have higher score  
126 than easy negatives in our proposed loss?”. Without such  
127 constraint, the scores of hard negatives ranked lower are  
128 trained to have smaller similarity with CPRD, and might  
129 even be lower than those easy negatives, which have a neg-  
130 ative impact on the performance of the dual-encoder. We  
131 test the variant loss  $\hat{\mathcal{L}}_{ij}$  which does not have the above con-  
132 straint. The original  $\mathcal{L}_{ij}$  and  $\hat{\mathcal{L}}_{ij}$  are formulated as:

$$133 \mathcal{L}_{ij} = -\log \frac{\exp(\mathbf{v}_i^\top \hat{\mathbf{t}}_{c_{ij}}/\tau)}{\sum_{k=j}^K \exp(\mathbf{v}_i^\top \hat{\mathbf{t}}_{c_{ik}}/\tau) + \sum_{k=K+1}^{B+N_q-1} \exp(\mathbf{v}_i^\top \hat{\mathbf{t}}_{d_{ik}}/\tau)}$$

$$134 \hat{\mathcal{L}}_{ij} = -\log \frac{\exp(\mathbf{v}_i^\top \hat{\mathbf{t}}_{c_{ij}}/\tau)}{\sum_{k=j}^K \exp(\mathbf{v}_i^\top \hat{\mathbf{t}}_{c_{ik}}/\tau)}$$

As shown in Table 3,  $\hat{\mathcal{L}}_{ij}$  is not as good as  $\mathcal{L}_{ij}$ , and it  
even has a negative impact on the baseline model, validating  
the importance of ensuring that valid hard negatives have  
higher score than easy negatives in the distillation loss.

**The choices between online hard negatives similarity calculation and offline approach.** As mentioned in Sec 3.2.2, using the cross-encoder to calculate similarity scores online brings additional training costs. To reduce the training cost, we can calculate the similarity of hard negative pairs in an offline manner. It is worth noting that, compared to online method, the offline computation for one teacher is heavier due to larger candidate number but only occurs once. Offline method is thus more efficient when reusing ranking targets (*e.g.*, training multiple students with one teacher). Otherwise (*e.g.*, training a student with varying teachers), online method is more efficient. The method choice depends on the scenarios.

## References

- [1] Andrea Frome, Greg S Corrado, Jon Shlens, Samy Bengio, Jeff Dean, Marc Aurelio Ranzato, and Tomas Mikolov. Devise: A deep visual-semantic embedding model. *Advances in neural information processing systems*, 26, 2013. 1
- [2] Chao Jia, Yinfei Yang, Ye Xia, Yi-Ting Chen, Zarana Parekh, Hieu Pham, Quoc Le, Yun-Hsuan Sung, Zhen Li, and Tom Duerig. Scaling up visual and vision-language representation learning with noisy text supervision. In *International conference on machine learning*, pages 4904–4916. PMLR, 2021. 2
- [3] Wonjae Kim, Bokyoung Son, and Ildoo Kim. Vilt: Vision-and-language transformer without convolution or region supervision. In *International Conference on Machine Learning*, pages 5583–5594. PMLR, 2021. 1
- [4] Junnan Li, Ramprasaath Selvaraju, Akhilesh Gotmare, Shafiq Joty, Caiming Xiong, and Steven Chu Hong Hoi. Align before fuse: Vision and language representation learning with momentum distillation. *Advances in neural information processing systems*, 34:9694–9705, 2021. 1
- [5] Tsung-Yi Lin, Michael Maire, Serge Belongie, James Hays, Pietro Perona, Deva Ramanan, Piotr Dollár, and C Lawrence Zitnick. Microsoft coco: Common objects in context. In *Computer Vision—ECCV 2014: 13th European Conference, Zurich, Switzerland, September 6–12, 2014, Proceedings, Part V 13*, pages 740–755. Springer, 2014. 1
- [6] Haoyu Lu, Nanyi Fei, Yuqi Huo, Yizhao Gao, Zhiwu Lu, and Ji-Rong Wen. Cots: Collaborative two-stream vision-language pre-training model for cross-modal retrieval. In *Proceedings of the IEEE/CVF Conference on Computer Vision and Pattern Recognition*, pages 15692–15701, 2022. 1
- [7] Zarana Parekh, Jason Baldrige, Daniel Cer, Austin Waters, and Yinfei Yang. Crisscrossed captions: Extended intramodal and intermodal semantic similarity judgments for ms-coco. In *Proceedings of the 16th Conference of the European Chapter of the Association for Computational Linguistics: Main Volume*, pages 2855–2870, 2021. 1, 2
